# Supplementary material for: A bifunctional TPE-based fluorescent sensor for liquid viscosity and amyloid β measurements
Source: Royal Society of Chemistry journal article supplement (doi:10.1039/d2nj05200h), 2022-12-28
Supplement: d2nj05200h1.pdf [file d2nj05200h1.pdf]

*Supporting information for*

# **Bifunctional TPE based Fluorescent Sensor for Liquid Viscosity and Amyloid $\beta$**

Hang Yao,<sup>a</sup> Na Wang,<sup>a</sup> **YuFeng Shi,<sup>a</sup>** Siyu Fang,<sup>a</sup> Ming Wu,<sup>a</sup> Hongying Fan,<sup>b</sup> **YueFei Zhang,<sup>c</sup>** Hui Chong,<sup>a,\*</sup> Tianyi Wang,<sup>a,\*</sup> Hualing Li,<sup>d</sup> and Chengyin Wang<sup>a,b,\*</sup>

<sup>a</sup> School of Chemistry and Chemical Engineering, Yangzhou University, Yangzhou 225009, China.

<sup>b</sup> Testing center of Yangzhou University, Yangzhou 225009, China.

<sup>c</sup> **Department of Emergency, Affiliated Hospital of Yangzhou University, Yangzhou 225000, Jiangsu, China.**

<sup>d</sup> Institute of Translational Medicine, Medical College, Yangzhou University, City of Yangzhou, Jiangsu Province, 225001, China.

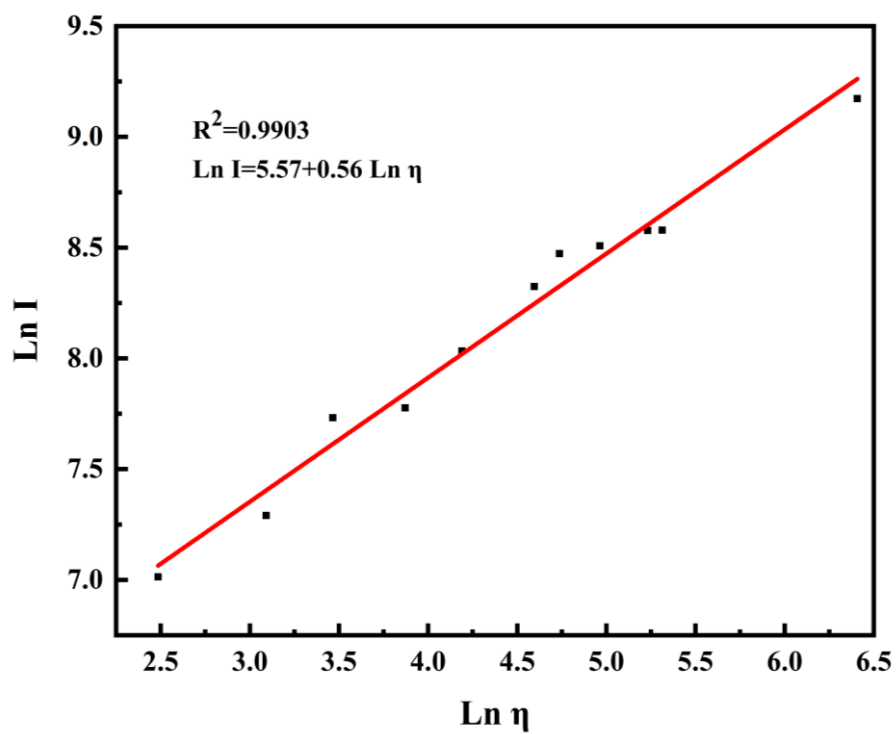

Figure S1. Repeated Plots of natural logarithmic fluorescent intensity of **TPE-Q** vs. natural logarithmic mixture viscosity. [**TPE-Q**] = 10  $\mu\text{M}$ , excitation wavelength was 340 nm.

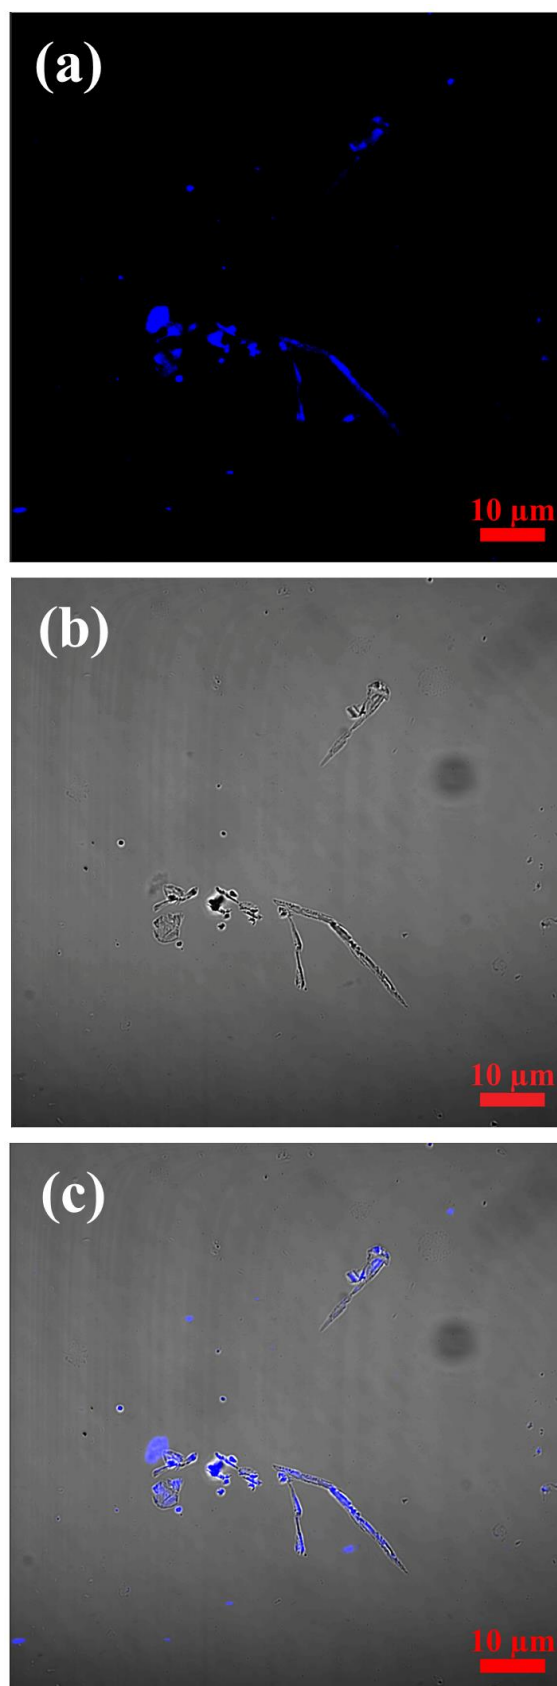

**Figure S2.** Fluorescent images of  $A\beta_{1-42}$  stained with **TPE-Q**. Excitation wavelength was 405 nm.  $[TPE-Q] = 1 \mu M$ ,  $[A\beta_{1-42}] = 10 \mu M$ . (a) Fluorescent field, (b) Bright field, (c) Merge

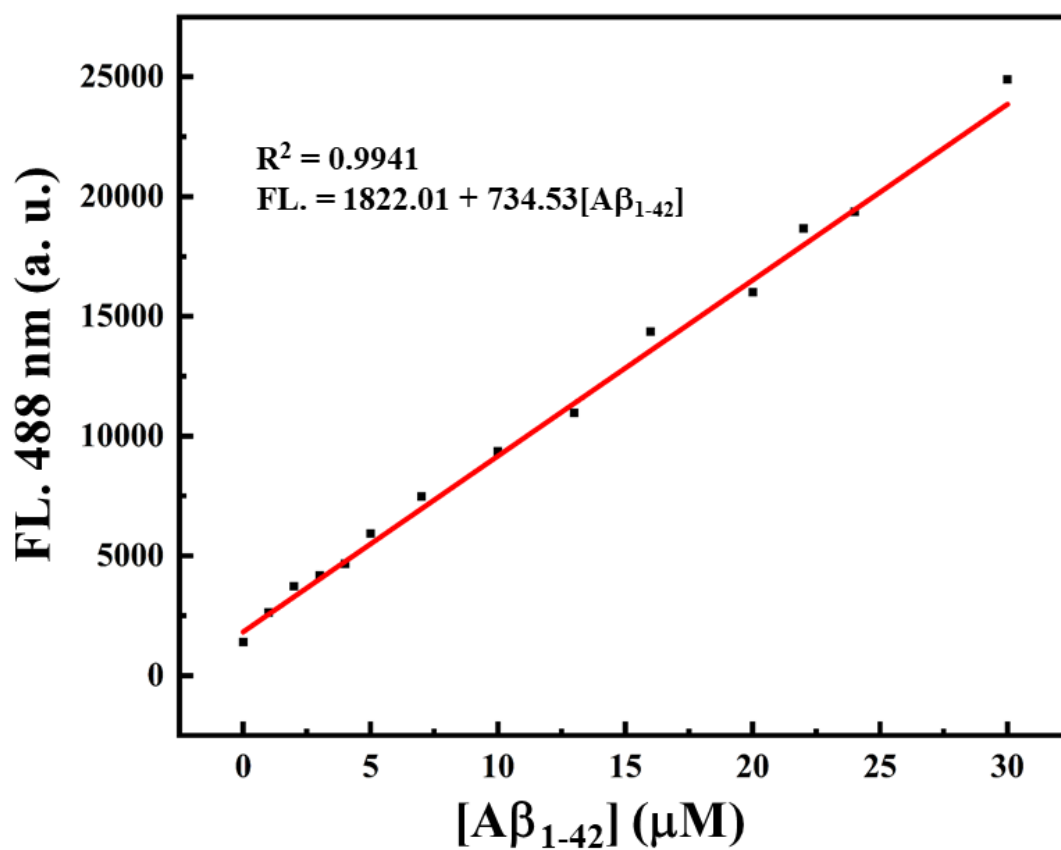

Figure S3. Repeated linear relationship of fluorescent emission intensity of TPE-Q and concentration of  $A\beta_{1-42}$ .

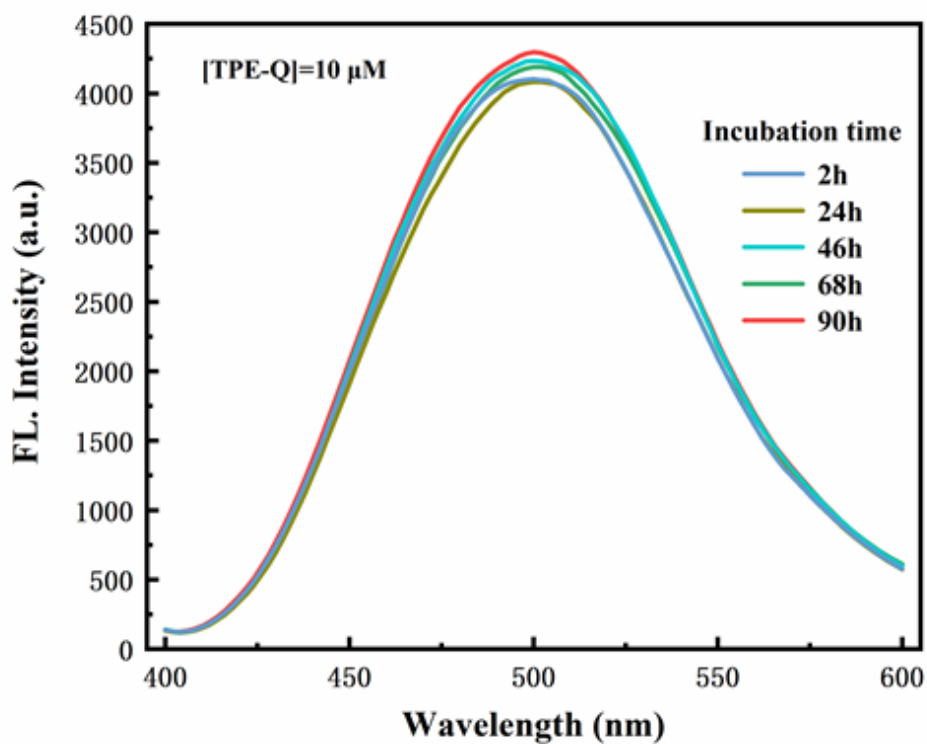

Figure S4. Repeated fluorescent spectra of TPE-Q in the absence of  $A\beta_{1-42}$  with different incubation time,  $[TPE-Q] = 10 \mu\text{M}$ .

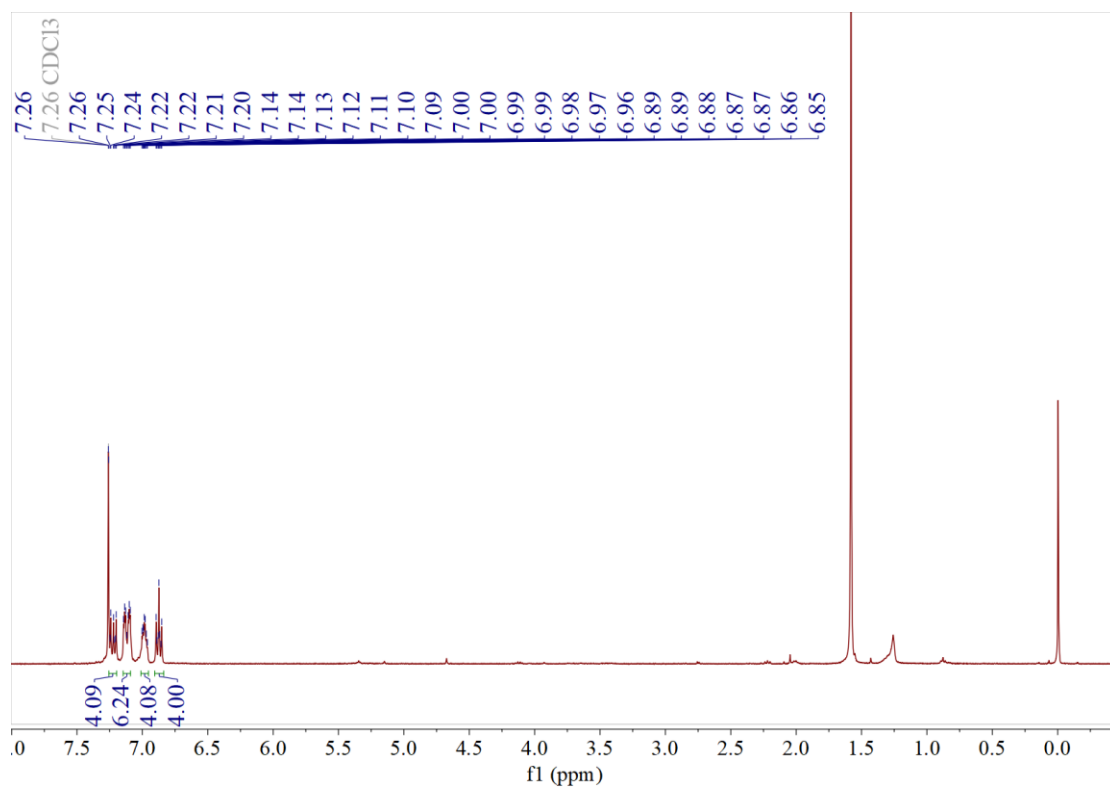

Figure S5.  $^1\text{H}$  NMR of compound **1**. ( $\text{CDCl}_3$ , 300 MHz)

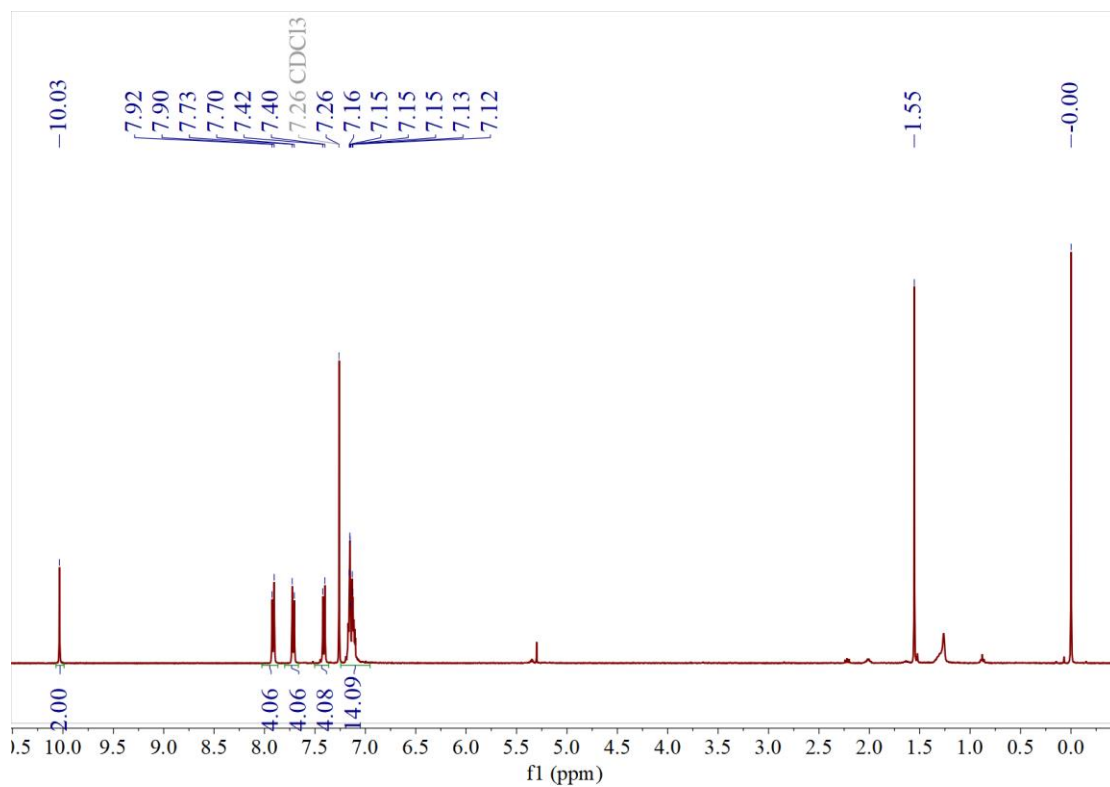

Figure S6.  $^1\text{H}$  NMR of compound **2**. ( $\text{CDCl}_3$ , 300 MHz)

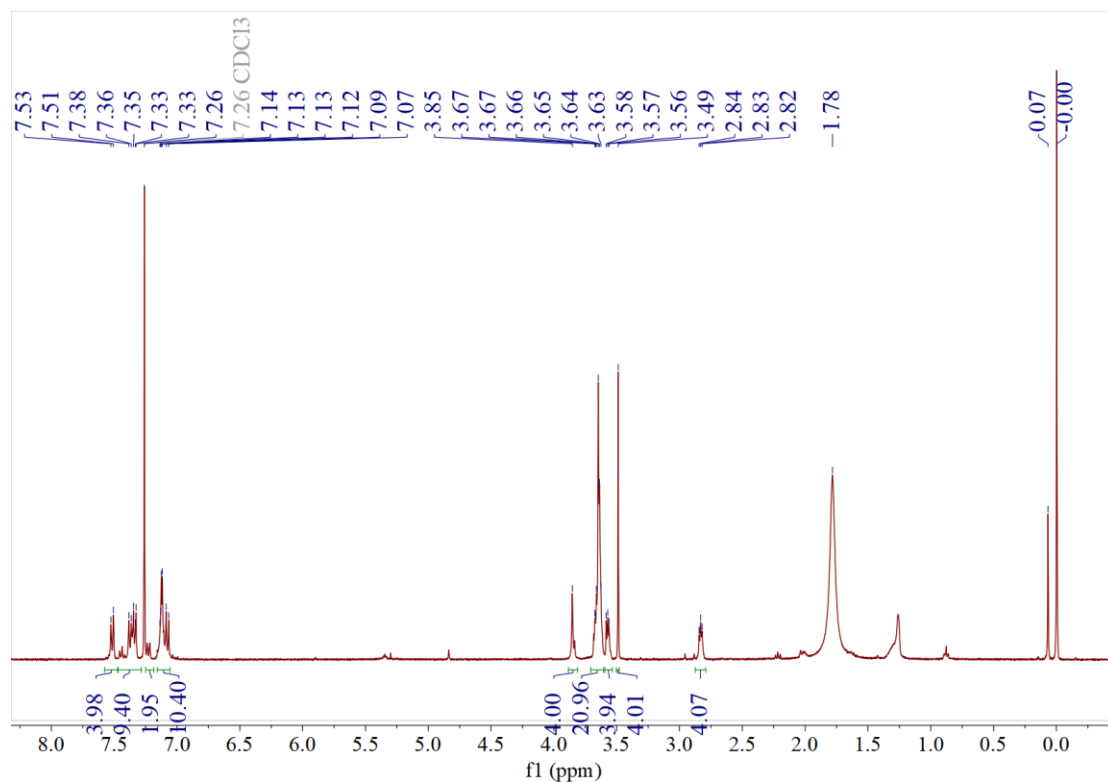

Figure S7. <sup>1</sup>H NMR of compound **3**. (CDCl<sub>3</sub>, 300 MHz)

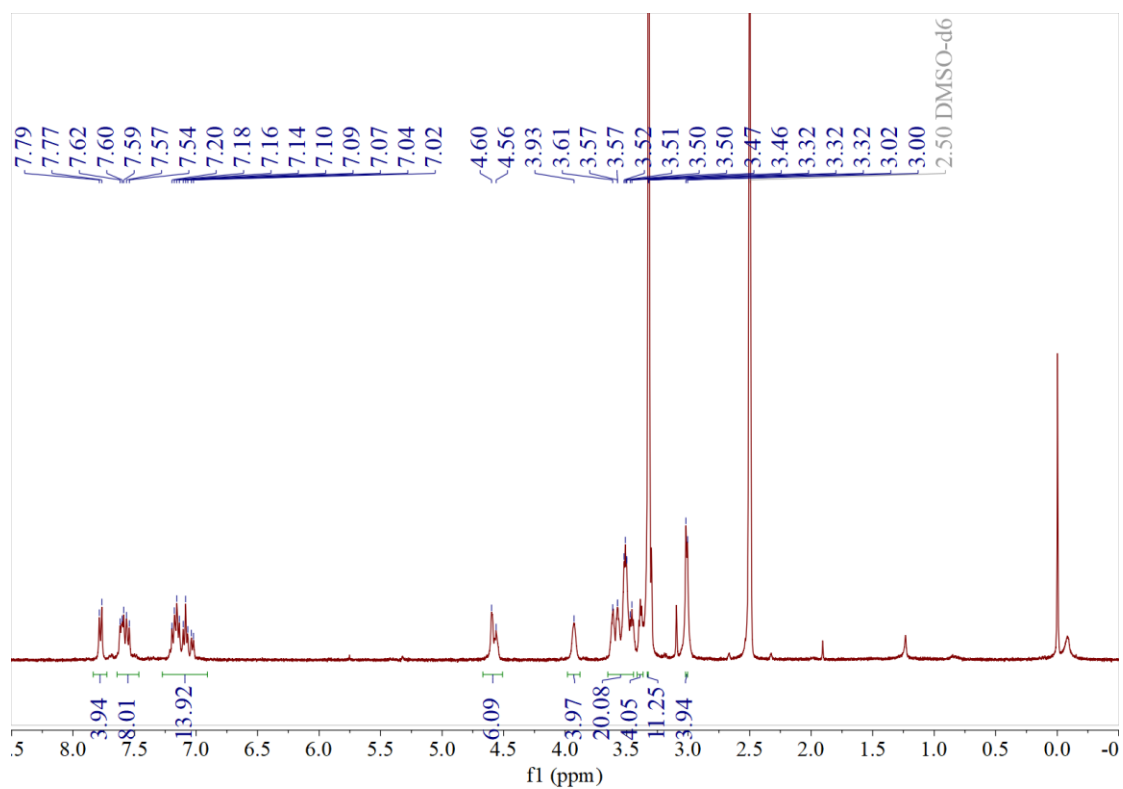

Figure S8. <sup>1</sup>H NMR of compound **TPE-Q**. (DMSO-*d*<sub>6</sub>, 300 MHz)

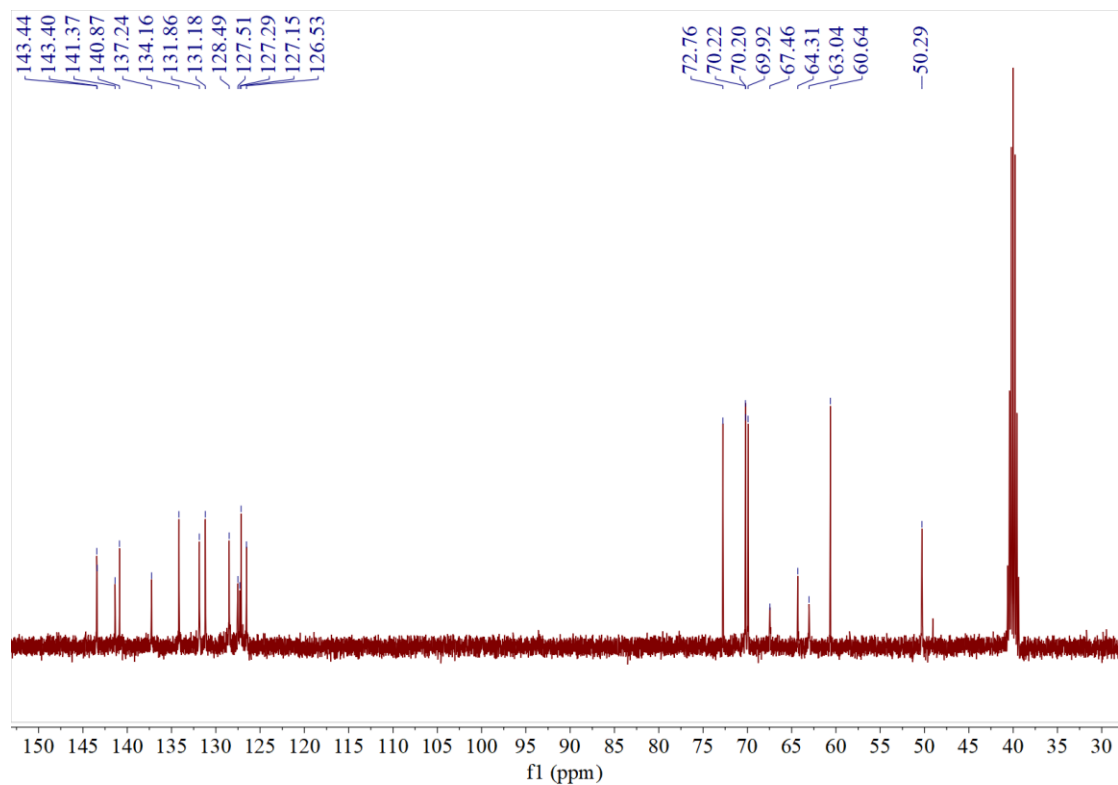

Figure S9.  $^{13}\text{C}$  NMR of compound TPE-Q. (DMSO- $d_6$ , 150 MHz)

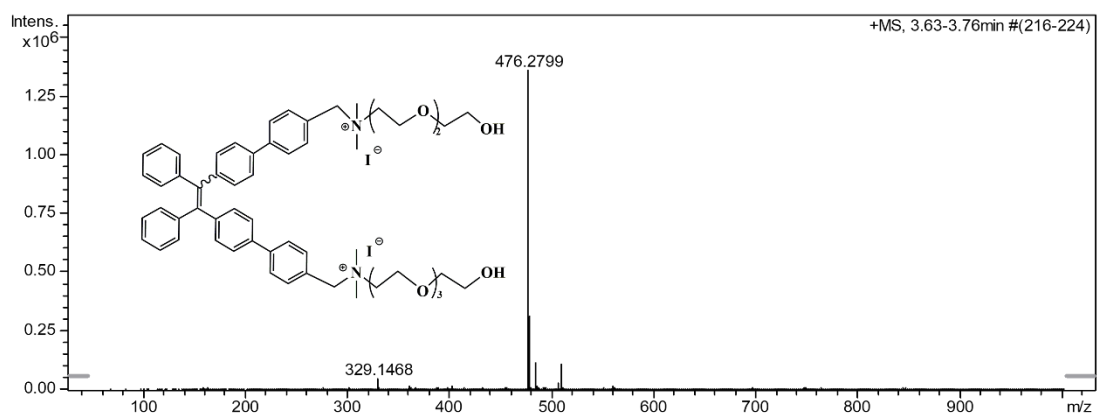

Figure S10. HRMS spectrum for TPE-Q.
